# Supplementary material for: Comparative Analysis of Acinetobacters: Three Genomes for Three Lifestyles
Source: PLoS One. 2008 Mar 19;3(3):e1805. doi: 10.1371/journal.pone.0001805 (PMC2265553; doi:10.1371/journal.pone.0001805)
Supplement: Table S1 — Labels of genes annotated as (putative) phospholipase in four Acinetobacter genomes. Frameshifted copies are indicated in bold type (part1–part2). aData from [64]. (0.02 MB XLS) [file pone.0001805.s003.xls]

## Sheet: Feuil1
	Table S1
		Phospholipase C	Phospholipase D	Phospholipase A
	Acinetobacter baylyi ADP1		ACIAD1881, ACIAD3001	ACIAD1354
	Acinetobacter baumannii AYE	ABAYE1520, ABAYE3825	ABAYE0498, ABAYE1870-71, ABAYE3304-05, ABAYE3393-94	ABAYE1656
	Acinetobacter baumannii SDF	ABSDF0054, ABSDF2207	ABSDF2854	ABSDF2059-60
	Acinetobacter baumannii ATCC17978a	A1S_0043, A1S_2055	A1S_2989	A1S_1919
